# Supplementary material for: Structure-specific endonuclease activity of SNM1A enables processing of a DNA interstrand crosslink
Source: PubMed Central journal article supplement — Nucleic Acids Res. 2018 Aug 27;46(17):9057–66. doi: 10.1093/nar/gky759 (PMC6158701; doi:10.1093/nar/gky759), 2018-08-27
Supplement: gky759_supplemental_files.pdf [file gky759_supplemental_files.pdf]

| Substrate          | Oligo                 | Sequence                                                                | Bases | Modifications |
|--------------------|-----------------------|-------------------------------------------------------------------------|-------|---------------|
| Gap                | gap.T                 | G*AGG GCGAGCCCGATTTTTCCGCTTGACCCAAGTAAGATTTTTGCAGATACTTAAC*A*C          | 60    | 5'6FAM        |
|                    | gap.B1                | A*GCGGAAAAAATCGGGCTCGCC*T*C                                             | 25    | --            |
|                    | gap.B2                | G*TGTTAAGTATCTGCAAAAAATC *T*T                                           | 25    | --            |
| 5' overhang        | 5'overhang.T          | T*TTTTTTTTTTTTTTACTGAGTCTACAGAAGG*A*T                                   | 35    | 5'6FAM        |
|                    | overhang.B            | G*AT CCT TCT GTA GGA CTC A*G*T                                          | 21    | --            |
| 5' pseudo Y        | 5'overhang.T          | T*TTTTTTTTTTTTTTACTGAGTCTACAGAAGG*A*T                                   | 35    | 5'6FAM        |
|                    | 5'O/H.polyT.B         | G*ATCCTTCTGTAGGACTCAGTTTTTTTTTTTTTT*T*T                                 | 36    |               |
| 5' flap            | 5'overhang.T          | T*TTTTTTTTTTTTTTACTGAGTCTACAGAAGG*A*T                                   | 35    | 5'6FAM        |
|                    | 5'O/H.B               | G*ATCCTTCTGTAGGACTCAGTCATATTATAACA*C*C                                  | 36    | --            |
|                    | SJG 5'flap.B3         | G*GTGTATAAATA*T*G                                                       | 15    | --            |
| 3' overhang        | 3'overhang.T          | A*CTGAGTCTACAGAAGGATCTTTTTTTTTTTTT*T*T                                  | 36    | 5'6FAM        |
|                    | overhang.B            | G*ATCCTTCTGTAGGACTCA*G*T                                                | 21    | --            |
| 3' pseudoY         | 3'overhang.T          | A*CTGAGTCTACAGAAGGATCTTTTTTTTTTTTT*T*T                                  | 36    | 5'6FAM        |
|                    | 3'O/H.polyT.B         | T*TTTTTTTTTTTTTTGATCCTTCTGTAGGACTCA*G*T                                 | 36    | --            |
| 3' flap            | 3'overhang.T          | A*CTGAGTCTACAGAAGGATCTTTTTTTTTTTTT*T*T                                  | 36    | 5'6FAM        |
|                    | 3'O/H.B               | C*ATATTTATAACCCGATCCTTCTGTAGGACTCA*G*T                                  | 36    | --            |
|                    | SJG 5'flap.B3         | G*GTGTATAAATA*T*G                                                       | 15    | --            |
| Symmetrical bubble | bubble.T              | A*GGCTGTGTTAAGTATCTGG-TTTTTTTTTGCTCGCCCTCAGGTCGAC*A*A                   | 50    | 5'6FAM        |
|                    | bubble.B              | T*TG TCGACCT-GAGGGCGAGCCCGATGAATTCAGTA TAC TTAACACAGC*C*T               | 50    | --            |
| Heterologous loop  | bubble.T              | A*GGCTGTGTTAAGTATCTGG-TTTTTTTTTGCTCGCCCTCAGGTCGAC*A*A                   | 50    | 5'6FAM        |
|                    | loop.B                | T*TGTCGACCTGAGGGCGAGCCAGTA CTTAACACAGC*C*T                              | 40    | --            |
| Stem loop          | stemloop.T            | GCTGACTGAGTCTACAGAAGGATCTTTTTTTTTTGATCCTT CTGTAGGACTCAGTCAG             | 60    | 5'6FAM        |
| Paired hairpin     | hairpin20             | G*AT TAC TAC GGT AG AGC TAC GTA GCT CTA CCG TAG TA*A*T                  | 35    | 5'6FAM        |
| Y-structure        | 5'Y.T                 | G*TACGTAACCTGACTGCTATCGACTGGACTTGATGCCG*T*C                             | 40    | 5'6FAM        |
|                    | Y.B1                  | G*ACGGCATCAAGTCCAGTCGCAGATGGCGTATAGCAGT*T*A                             | 40    | --            |
|                    | Y.B2                  | T*AACTGCTATAC-GCCATCTGATAGCAGTCAGGTTACGT*A*C                            | 41    | --            |
| 5'P                | 5'P                   | TTTTTTTTTTTTTTTTTTTT                                                    | 20    | 3'6FAM, 5'P   |
| 5'OH               | 5'OH                  | TTTTTTTTTTTTTTTTTTTT                                                    | 20    | 3'6FAM        |
| 5'F (PolyT)        | PolyT                 | T*TTTTTTTTTTTTTTTT*T*T                                                  | 23    | 5'6FAM        |
| PolyA              | PolyA                 | A*AAAAAAAAAAAAAAAAA*A*A                                                 | 23    | 5'6FAM        |
| PolyAC             | PolyAC                | A*AACCCAAACCCAAACCC*A*A                                                 | 20    | 5'6FAM        |
| SJG ICL 5' P       | SJG(AT).5O/H.5'P.3F.T | TTTTTTTTTTTTTTATAAATTTAATTTGATCATTTATTATAAATTTATTAT*A*T                 | 56    | 3'6FAM, 5'P   |
| SJG ICL 5'Y OH     | SJG(AT).5O/H.3F.T     | T*T*TTTTTTTTTTTTTTATAAATTTAATTTGATCATTTATTATAAATTTATTAT*A*T             | 56    | 3'6FAM        |
| SJG ICL 5'Y F      | SJG(AT).5O/H.5F.T     | T*T*TTTTTTTTTTTTTTATAAATTTAATTTGATCATTTATTATAAATTTATTAT*A*T             | 56    | 5'6FAM        |
|                    | SJG(AT:5'O/H).B       | A*TATAATAAAATTTATAATAAATGATCAAATTAATAATTCATATTTATAACA*C*C               | 56    | --            |
|                    | SJG 5'flap.B3         | G*GTGTATAAATA*T*G                                                       | 15    | --            |
| Short ICL          | pSJG-T-Cy3            | ATAATTT GATC ATCTATTATA                                                 | 21    | 3'CY3, 5'P    |
|                    | SJG-B-Cy3             | T*ATAATAGATGATCAAAT*A*T                                                 | 21    | --            |
| Long ICL           | SJG(AT).T             | ATAATTT GATC ATTTATTATAAATTTATTATAT                                     | 34    | 3'CY3, 5'P    |
|                    | SJG(AT).B             | A*TATAATAAAATTTATAATAAATGATCAAAT*A*T                                    | 34    | --            |
|                    |                       | * denotes phosphorothioate substitution to prevent exonuclease cleavage |       |               |

## Supplementary 1: Oligonucleotides for nuclease assays.

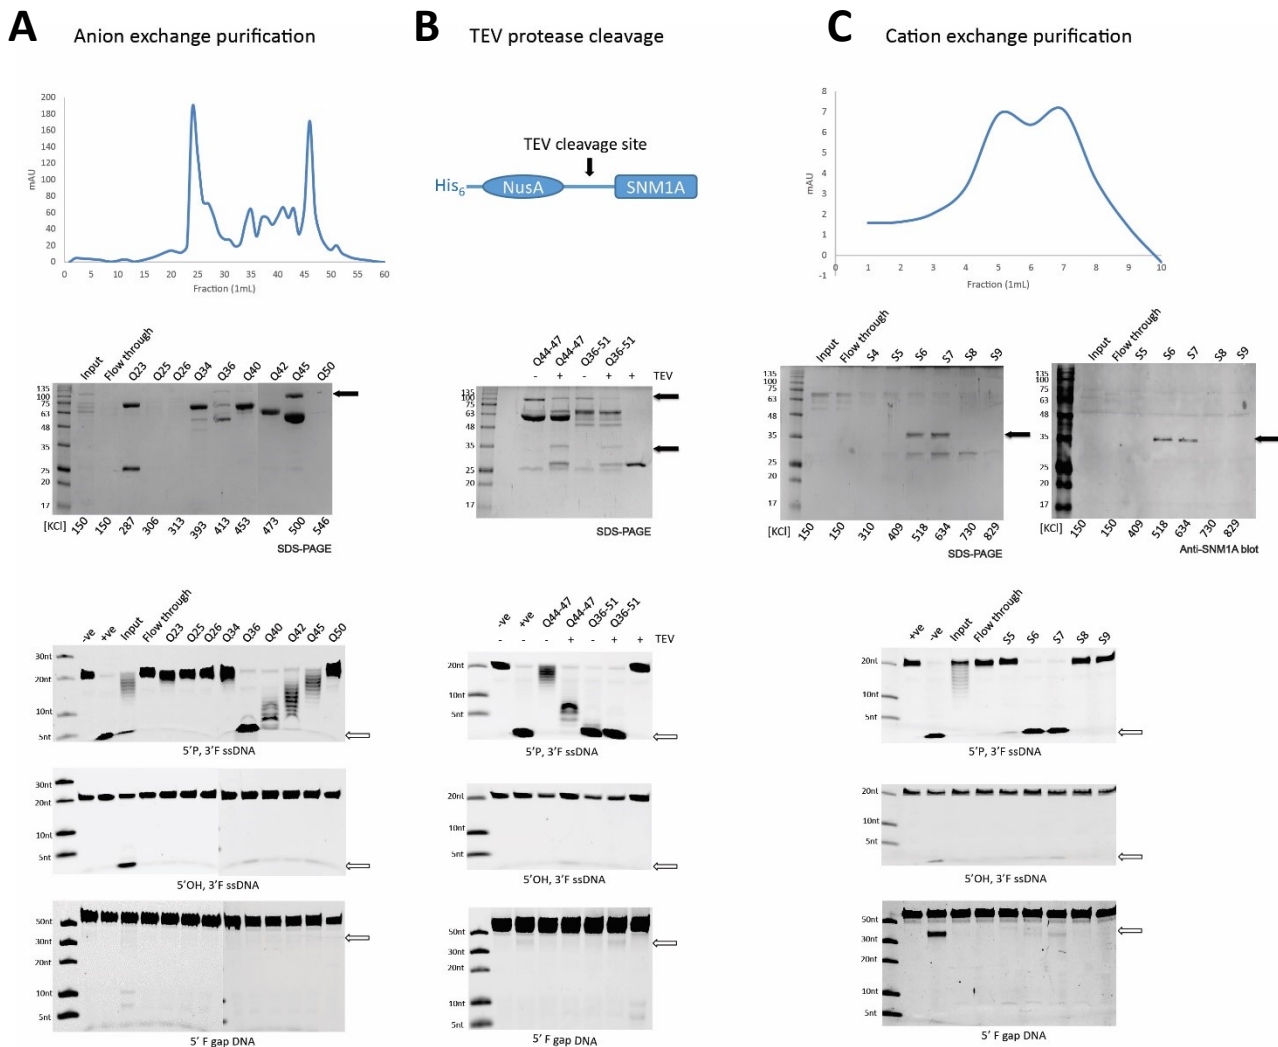

**Supplementary 2: Analysis of nuclease activity in SNM1A purification fractions.** Following nickel affinity purification, fractions containing SNM1A were pooled and further purified using a MonoQ anion exchange column (GE Healthcare) and linear salt gradient (0.1-1M). Proteins present in collected fractions (20uL) were resolved with 9% SDS PAGE and stained with Coomassie. Nuclease activity present within these fractions was analyzed using indicated substrates. Nuclease assays were performed using 1uL of protein from a given fraction. (B) TEV protease removal of the N-terminal NusA fusion enhances SNM1A nuclease activity. Anion exchange fractions containing His-NusA SNM1A were pooled and digested with TEV protease overnight. Products were resolved with 9% SDS PAGE and stained with Coomassie. Nuclease activity was determined as in (A). (C) Analysis of nuclease activity in fractions from cation exchange purification of SNM1A. SNM1A was further purified using a MonoS cation exchange column (GE Healthcare) and a linear salt gradient (0.1-1M). Fractions (40uL) were resolved with 9% SDS PAGE and stained with Blue Silver. The identity of SNM1A was confirmed using an anti-SNM1A polyclonal antibody (sc-367631, Santa Cruz Biotechnology). Nuclease activity was determined as in (A). Fractions from different chromatographic steps are indicated with Q, S to indicate MonoQ and MonoS, respectively. The number following Q or S denotes the fraction or pool of fractions analyzed. Black arrows indicate SNM1A protein (fusion and/or cleaved); open arrows indicate expected nuclease products.

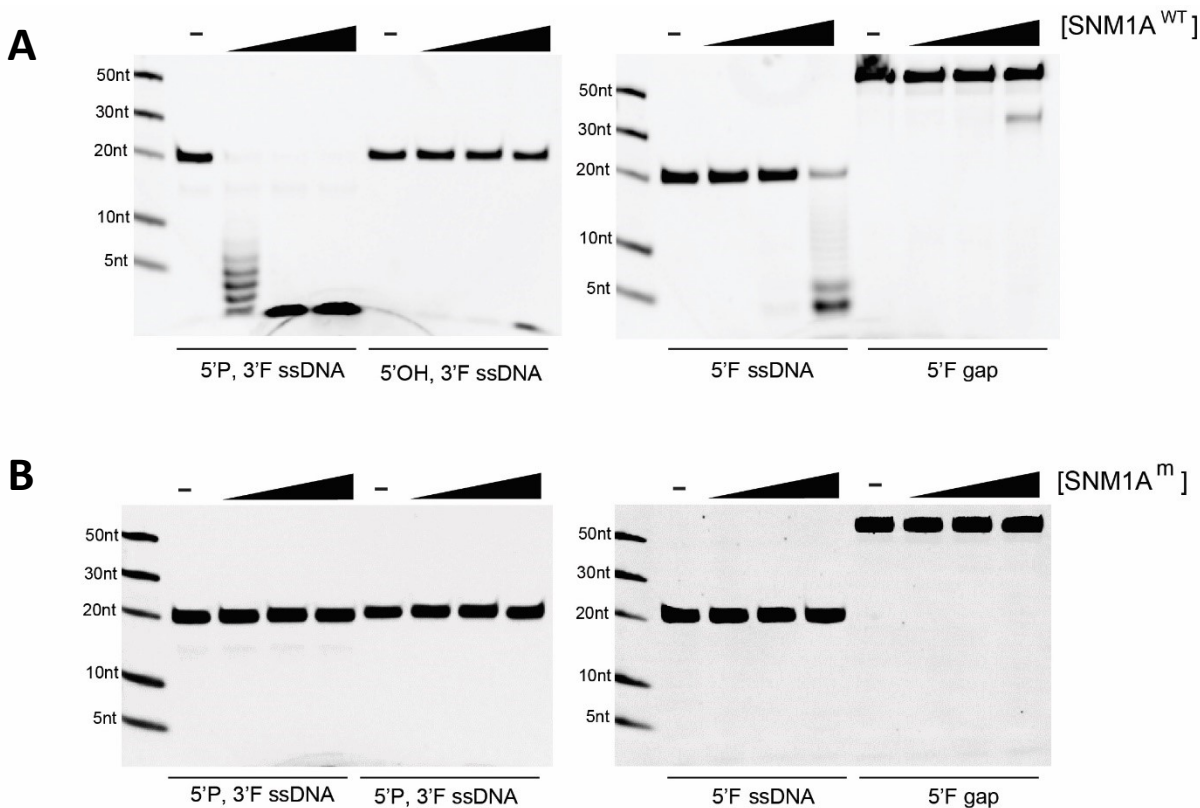

**Supplementary 3: Observed SNM1A nuclease activities are not due to contaminating nucleases.**

Observed SNM1A nuclease activities are not due to contaminating nucleases. Comparison of nuclease activities for wild-type and catalytically inactive SNM1A mutant. 1-100nM of wild-type SNM1A (A) and catalytic mutant SNM1A<sup>m</sup> (B) were incubated with indicated substrates for 60 minutes. Products were resolved using 20% denaturing PAGE and imaged with ChemiDoc XRS (BioRad) at 526nm.

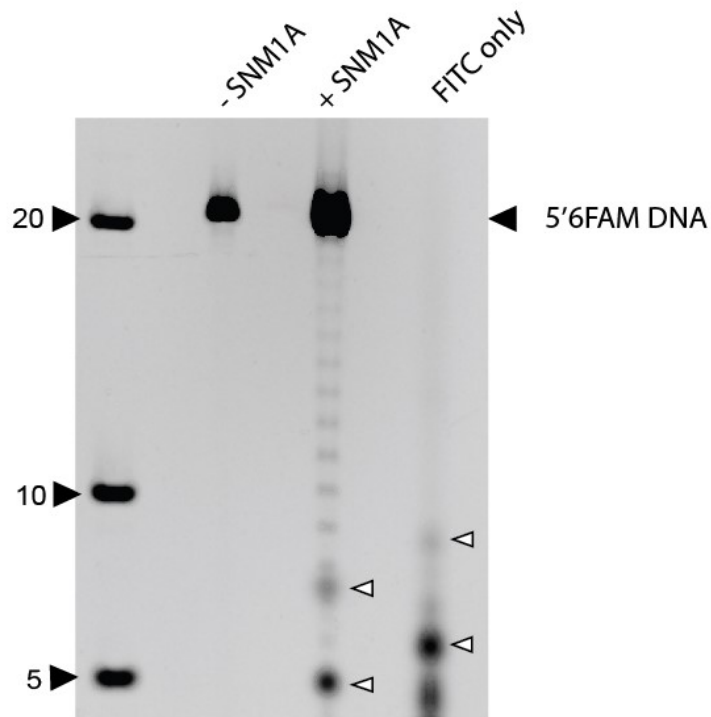

**Supplementary 4: Aberrant processing of 6FAM label by SNM1A.** Activity of SNM1A on 5'fluorophore-labelled DNA results in distinct shadows between five and ten nucleotides (indicated by white triangles). Free fluorescein isocyanate (FITC) fluorophore also has similar distinct shadows, suggesting aberrant processing of the 6FAM fluorophore label. Products were resolved using 20% denaturing PAGE and imaged with Typhoon Imager (GE Healthcare) at 526nm.

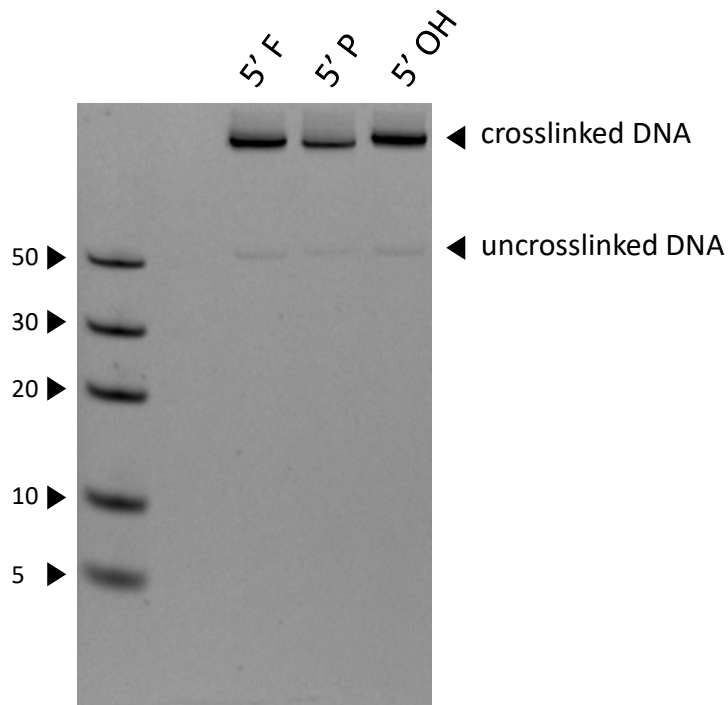

**Supplementary 5: Analysis of purity of SJG-136 crosslinked 5' flap DNA substrates.** (A) 5' flap cross-linked DNA substrates ((100nM) used in Figure 4 were incubated without protein for 60 minutes at 37°C . Substrates were resolved using 20% denaturing PAGE and imaged with the ChemiDoc XRS (BioRad) at 526nm. Approximately 3% of substrate exists as uncross-linked DNA.

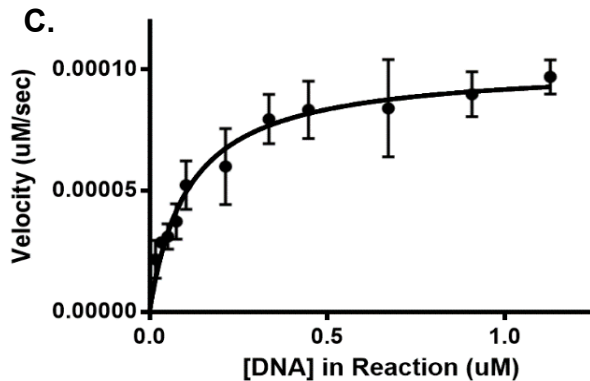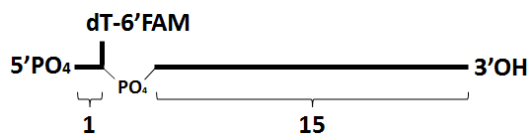

|                      |       |                                 |
|----------------------|-------|---------------------------------|
| $V_{max}$            | 101.8 | $\mu\text{M}/\text{sec}$        |
| $K_M$                | 109.1 | $\mu\text{M}$                   |
| $K_{cat}$            | 0.53  | $\text{s}^{-1}$                 |
| Catalytic Efficiency | 4.85  | $\mu\text{M}^{-1}\text{s}^{-1}$ |

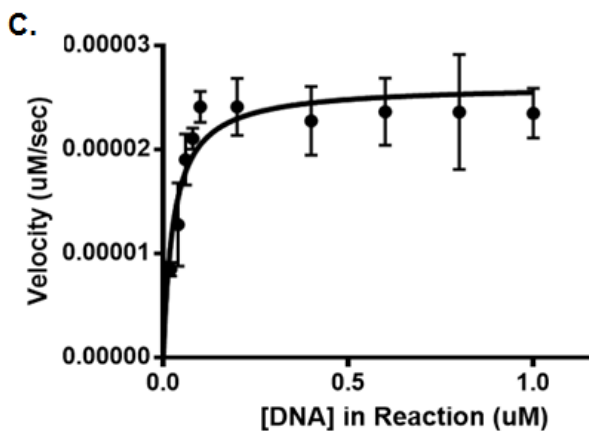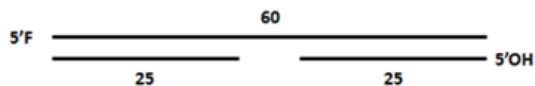

|                      |         |                                 |
|----------------------|---------|---------------------------------|
| $V_{max}$            | 26.2    | $\mu\text{M}/\text{sec}$        |
| $K_M$                | 28.01   | $\mu\text{M}$                   |
| $K_{cat}$            | 0.00014 | $\text{s}^{-1}$                 |
| Catalytic Efficiency | 0.00487 | $\mu\text{M}^{-1}\text{s}^{-1}$ |

**Supplementary 6: Kinetic analysis of SNM1A.** SNM1A (0.02, 2  $\mu\text{M}$ ) was incubated with ssDNA with 5' phosphate, internal fluophore label (A) for 60 minutes or gap DNA with 5'6-FAM label (B) 120 minutes, respectively. Products were resolved using 22.5% denaturing PAGE and imaged with the ChemiDoc XRS (BioRad) at 526nm. Gels were quantified in quadruplicate with ImageLab and analyzed with curve fitting software Prism GraphPad.

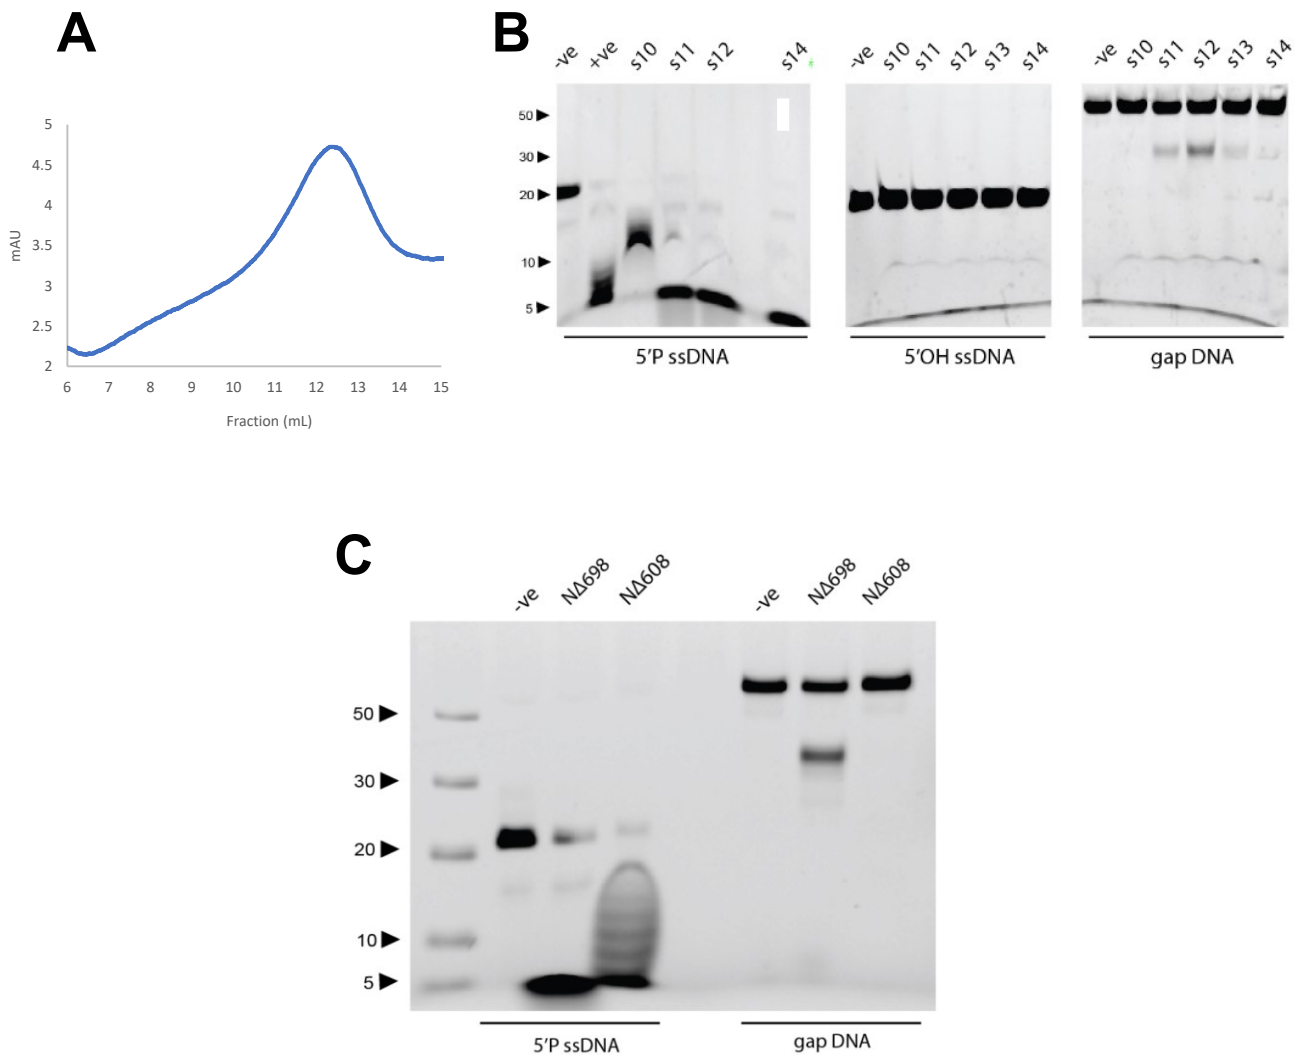

**Supplementary 7: Analysis of nuclease activity in fractions from cation exchange purification of  $\text{SNM1A}^{\text{N}\Delta 608}$ .** (A) Chromatogram of SNM1A S-seph cation exchange linear salt gradient (0.1-1M). (B) Nuclease activity of S-seph fractions. 1.5 $\mu\text{L}$  of each fraction from (A) was incubated with ssDNA with 3'-FAM label for 60 minutes or gap DNA with 5'-FAM label 120 minutes. Products were resolved using 20% denaturing PAGE and imaged with the ChemiDoc XRS (BioRad) at 526nm. (C) Nuclease activity of flash frozen S12 fractions of  $\text{SNM1A}^{\text{N}\Delta 698}$  (1 $\mu\text{L}$ ) and  $\text{SNM1A}^{\text{N}\Delta 608}$  (5 $\mu\text{L}$ ). Protein was incubated with ssDNA with 3'-FAM label for 60 minutes or gap DNA with 5'-FAM label 120 minutes. Products were resolved using 20% denaturing PAGE and imaged with the ChemiDoc XRS (BioRad) at 526nm.
